# Supplementary material for: Multifunctional electrochemical biosensor with “tetrahedral tripods” assisted multiple tandem hairpins assembly for ultra-sensitive detection of target DNA
Source: Royal Society of Chemistry journal article supplement (doi:10.1039/d1ra02424h), 2021-01-01
Supplement: d1ra02424h1.pdf [file d1ra02424h1.pdf]

# Support Information

Multifunctional electrochemical biosensor with "tetrahedral tripods" assisted multiple tandem hairpins assembly for ultra-sensitive detection of target DNA

Yuqi Huang<sup>a</sup>, Shuhui Zhao<sup>a</sup>, Wenxiu Zhang<sup>a</sup>, Qiuyue Duan<sup>a</sup>, Qi Yan<sup>a</sup>, Hu Fu<sup>b</sup>, Liang Zhong<sup>a</sup>, Gang Yi<sup>a\*</sup>

*<sup>a</sup>Key Laboratory of Medical Diagnostics of Ministry of Education,  
Department of Laboratory Medicine, Chongqing Medical University,  
Chongqing 400016, PR China*

*<sup>b</sup>Clinical Laboratory of Chengdu First People's Hospital, Chengdu  
610000, PR China*

---

\*Corresponding author. Tel: +86 23 68485240; Fax: +86 23 68485239  
E-mail address: yigang666@cqmu.edu.cn (G. Yi).

**Table S1 DNA sequences used in this work**

| Name                              | Sequences (5' - 3')                                                                                         |
|-----------------------------------|-------------------------------------------------------------------------------------------------------------|
| TTs-S1                            | ACATTCCTAAGTCTGAAACATTACAGCTTGCTACACGAGAAGAGCCGC<br>CATAGTATTTAAAGCTCGGCAGCTCCGGCCTGCG                      |
| TTs-S2                            | SH-C6-<br>TATCACCAGGCAGTTGACAGTGTAGCAAGCTGTAATAGATGCGAGGGT<br>CCAATAC                                       |
| TTs-S3                            | SH-C6-<br>TCAACTGCCTGGTGATAAAACGACACTACGTGGGAATCTACTATGGCG<br>GCTCTTC                                       |
| TTs-S4                            | SH-C6-<br>TTCAGACTTAGGAATGTGCTTCCCACGTAGTGTCTGTATTGGACCC<br>TCGCAT                                          |
| TTS1-miRNA 141                    | ACATTCCTAAGTCTGAAACATTACAGCTTGCTACACGAGAAGAGCCGC<br>CATAGTACCATCTTTACCAGACAGTGTACGCATTTTGTGTGTTTGT<br>TGGTA |
| microRNA 141                      | UAACACUGUCUGGUAAAGAUGG                                                                                      |
| Target DNA                        | TCTCAAGGACCACCGCATCTCTACCGCAGGCCGGAGCTGCCGAGCTTT                                                            |
| Methylated DNA                    | TCTCAAGGACCACCGCATCTCTACCGCAGGCCmGGAGCTGCCGAGCTT<br>T                                                       |
| Hairpin H1                        | GTAGAGATGCGGTGGTCCTTGAGAGAATTCTTAACGTCGCCTCATACT<br>GTCTCAAGGACCACCGCAT                                     |
| Hairpin H2                        | TCTCAAGGACCACCGCATCTCTACATGCGGTGGTCCTTGAGACAGTAT<br>GCCTAGCAGAGTT                                           |
| Hairpin H3                        | TCGCCTCCTAGCAGAGTTACTTTGAAACTCTGCTAGGAGGCGACGTTA<br>AGAATTC                                                 |
| Hairpin H4                        | TCAAAGTAACTCTGCTAGGAGGCGAGAATTCTTAACGTCGCCTCCTAG<br>CAGAGTT                                                 |
| Hairpin H1-miRNA 141              | TACCAGACAAACACAACAAAATGCGGAATTCTTAACGTCGCCTCATACT<br>TGCGCATTTTGTGTGTTTGT                                   |
| Hairpin H2-miRNA141               | CGCATTTTGTGTGTTTGTCTGGTACAAACACAACAAAATGCGCAGTAT<br>GCCTAGCAGAGTT                                           |
| Single-stranded capture probe     | SH-C6-TTTTTAAAGCTCGGCAGCTCCGGCCTGCG                                                                         |
| Single-base mismatched DNA        | TCTCAAGGACCACCGCATCTCTACCGCAGGCCGGAGCTGCCGAGCTTT                                                            |
| Two-base mismatched DNA           | TCTCAAGGACCACGGCATCTCTACCGCAGGCCGGAGCTGCCGAGCTTT                                                            |
| Multi-base Mismatched DNA         | TCTCAAGGAGCAGGGCATCTCTACCGCACGCCGGAGCTGCCGAGCTTT                                                            |
| Non-complementary base mismatch-A | CGTGGAAGCACTCTTGCTAAACACGCAGGCCGGAGCTGCCGAGCTTT                                                             |
| Non-complementary base mismatch-B | TCTCAAGGACCACCGCATCTCTACCGTGGAAAGCACTCTTGCTAAACA                                                            |

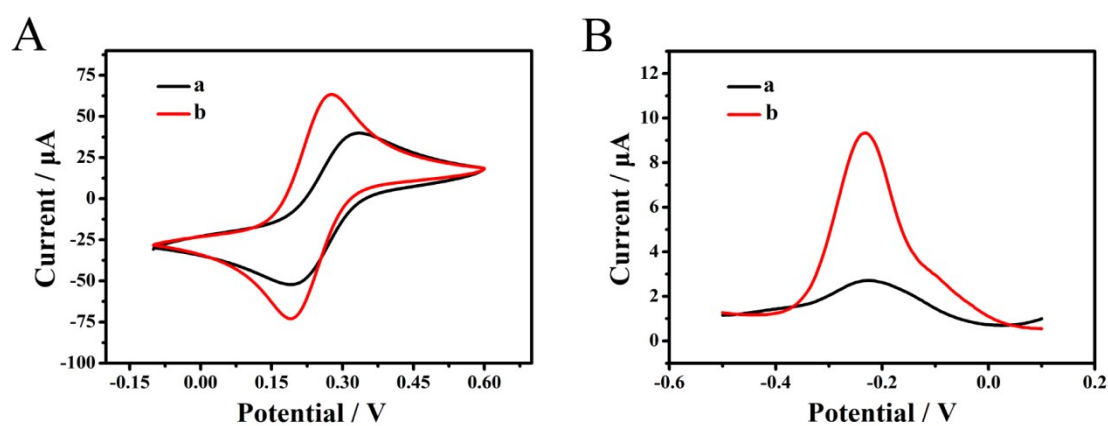

**Fig. S1.** CV (A) and DPV(B) of the fabricated biosensor. (a) MTHsA/MCH/TTs/Au electrode. (b) MTHsA/miRNA/MCH/TTs/Au electrode. CV current response of the incubation process carried out in 5 mM  $\text{Fe}(\text{CN})_6^{3-/4-}$  with 0.1 M KCl solution, pH=7.4. DPV current response of the incubation process carried out in 10mM Tris-HCl with 50 $\mu\text{M}$  RuHex.

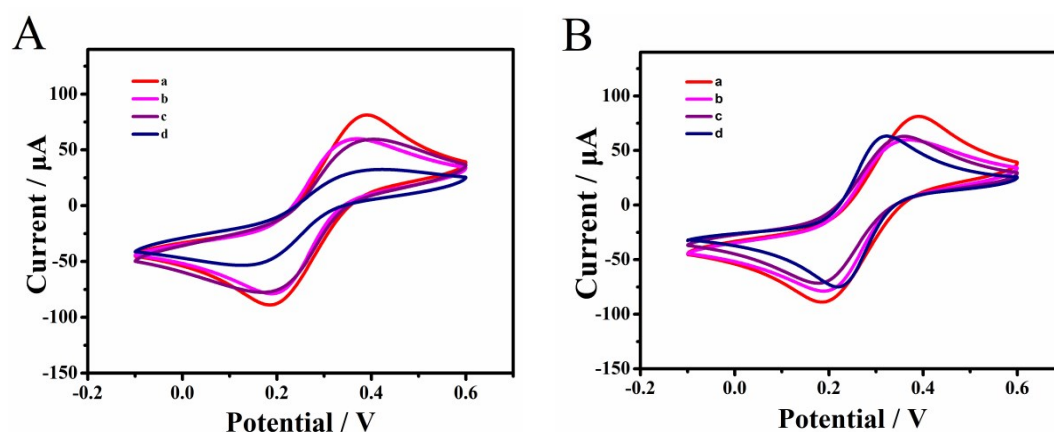

**Fig. S2.** CV (A) and (B) of the developed biosensor were respectively methylated DNA and unmethylated DNA after 50 U/mL Hpa II endonuclease digestion. (a) TTs/Au electrode, (b) Methylated DNA or Unmethylated DNA /MCH/TTs/Au electrode, (c) Hpa II enzyme /Methylated DNA or Unmethylated DNA/MCH/TTs/Au electrode, (d) MTHsA/Hpa II enzyme /Methylated DNA or Unmethylated DNA/MCH/TTs/Au electrode.

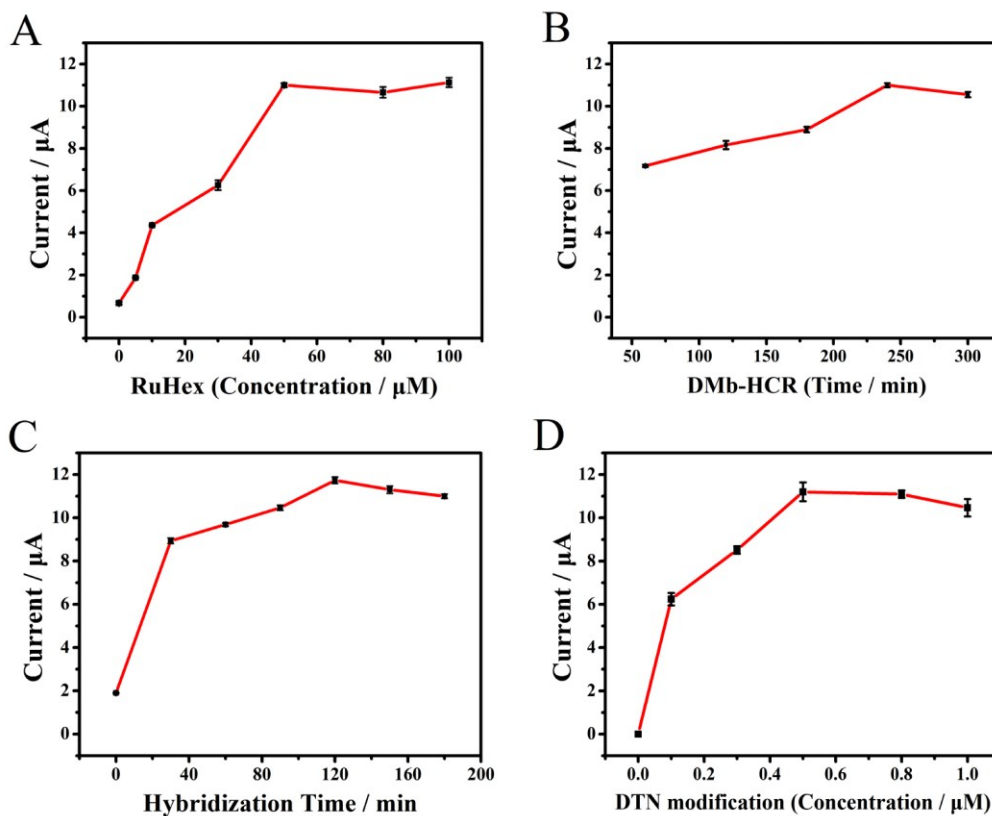

**Fig. S3.** (A) The optimization of RuHex concentration. (B) The optimization of MTHsA reaction time. (C) The optimization of DNA hybridization time with the target DNA. (D) The optimization of TTs concentration. The error bars show the standard deviations of electrochemical measurements taken from the three tests.

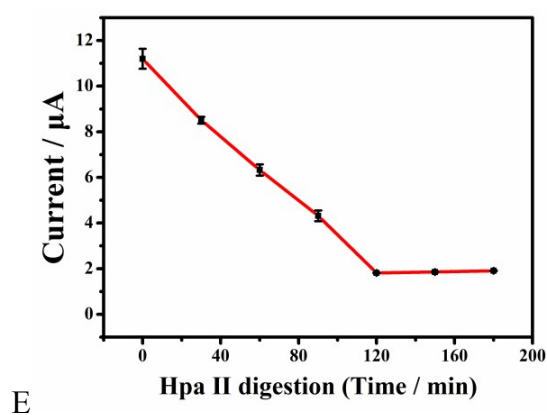

**Fig. S4.** The optimization of digestion time of Hpa II endonuclease. Error bars show the standard deviations of electrochemical measurements taken from the three tests.

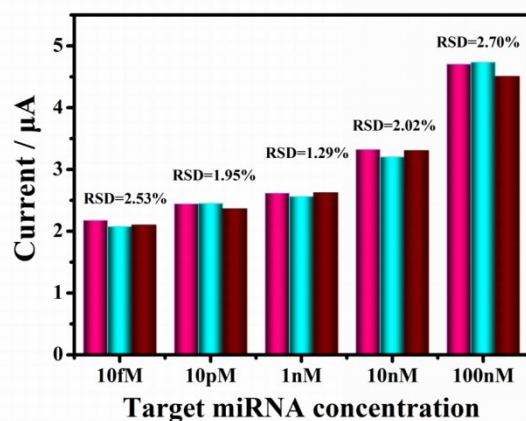

**Fig. S5.** Comparison of the reproducibility for different target miRNA concentration in 10% human serums (n=3) on the fabricated electrochemical biosensor.

**Table S2** Electrochemical analysis results of spiking DNA into human serum.

| Samples | Added DNA | Detected DNA | Recovery (%) (n = 3) | RSD (%) |
|---------|-----------|--------------|----------------------|---------|
| 1       | 10 fM     | 10.06 fM     | 100.6                | 0.98    |
| 2       | 100 fM    | 105.54 fM    | 105.54               | 0.72    |
| 3       | 1 pM      | 1.017 pM     | 101.71               | 0.52    |
| 4       | 10 pM     | 9.857 pM     | 98.57                | 1.01    |
| 5       | 100 pM    | 96.03 pM     | 96.03                | 0.72    |

**Table S3** The comparison of the constructed electrochemical biosensor towards MTHsA with other reported methods for target DNA detection.

| Amplification strategy | Analytical technique | Linear range      | LOD     | Reference |
|------------------------|----------------------|-------------------|---------|-----------|
| ACTRAa/Exo III         | DPV                  | 10 fM to 500 fM   | 10 fM   | 1         |
| NHCRb/HRP              | Amperometric         | 1 fM to 1000 fM   | 0.4 fM  | 2         |
| CHAc/AuNP              | Colorimetric         | 50 pM to 700 pM   | 9 pM    | 3         |
| TMSDd/MB               | DPV                  | 0.01 pM to 100 pM | 8.2 fM  | 4         |
| ZrHCF MNPs e/MBs       | DPV                  | 1.0 fM to 1.0 nM  | 0.43 fM | 5         |
| CSDPRf/HCR             | DPV                  | 10 fM to 1 nM     | 8fM     | 6         |
| HCR/HRP                | Chronoamperometric   | 1 aM to 1 pM      | 0.93 aM | 7         |

|             |     |                |         |             |
|-------------|-----|----------------|---------|-------------|
| DNCg/HCR    | DPV | 5 aM to 1 pM   | 5 aM    | 8           |
| MTHsA/RuHex | DPV | 1 aM to 100 pM | 0.59 aM | This method |

<sup>a</sup> ACTRA, autocatalytic target recycling amplification; <sup>b</sup> NHCR, nonlinear hybridization chain reaction; <sup>c</sup> CHA, catalyzed hairpin assembly; <sup>d</sup> TMSD, toehold-mediated strand displacement; <sup>e</sup> ZrHCF MNPs, magnetic zirconium hexacyanoferrate nanoparticles; <sup>f</sup> CSDPR, circular strand-displacement polymerase reaction; <sup>g</sup> DNC, dendritic DNA concatamer.

## References

- 1 G. Jie, L. Tan, Y. Zhao, X. Wang, A novel silver nanocluster in situ synthesized as versatile probe for electrochemiluminescence and electrochemical detection of thrombin by multiple signal amplification strategy, *Biosens. Bioelectron.* 94 (2017)
- 2 L. Jia, S. Shi, R. Ma, W. Jia, H. Wang, Biosensors and Bioelectronics Highly sensitive electrochemical biosensor based on nonlinear hybridization chain reaction for DNA detection, *Biosens. Bioelectron.* 80 (2016) 392–397.
- 3 H. He, J. Dai, Z. Duan, Y. Meng, C. Zhou, Y. Long, B. Zheng, J. Du, Y. Guo, D. Xiao, Biosensors and Bioelectronics Target-catalyzed autonomous assembly of dendrimer-like DNA nanostructures for enzyme-free and signal amplified colorimetric nucleic acids detection, *Biosens. Bioelectron.* 86 (2016) 985–989.
- 4 Y. Zhang, W. Wang, Z. Lin, B. Liu, X. Zhou, Biosensors and Bioelectronics Dual-output toehold-mediated strand displacement amplification for sensitive homogeneous electrochemical detection of specie-specific DNA sequences for species identification, *Biosens. Bioelectron.* 161 (2020) 112256.
- 5 G. Zhang, S. Deng, W. Cai, S. Cosnier, X. Zhang, D. Shan, Magnetic Zirconium Hexacyanoferrate(II) Nanoparticle as Tracing Tag for Electrochemical DNA Assay, *Anal. Chem.*, 2015,87,9093-9100.
- 6 C. Wang, H. Zhou, W. Zhu, H. Li, J. Jiang, G. Shen, R. Yu, Biosensors and Bioelectronics Ultrasensitive electrochemical DNA detection based on dual ampli fi

cation of circular strand-displacement polymerase reaction and hybridization chain reaction, *Biosens. Bioelectron.* 47 (2013) 324–328.

7 X. Chen, J. Huang, S. Zhang, F. Mo, S. Su, Y. Li, L. Fang, J. Deng, H. Huang, Z. Luo, J. Zheng, Electrochemical Biosensor for DNA Methylation Detection through Hybridization Chain-Amplified Reaction Coupled with a Tetrahedral DNA Nanostructure, *ACS applied materials & interfaces* 11 (2019) 3745-52.

8 S. Liu, Y. Lin, T. Liu, C. Cheng, W. Wei, L. Wang, F. Li, *Biosensors and Bioelectronics* Enzyme-free and label-free ultrasensitive electrochemical detection of DNA and adenosine triphosphate by dendritic DNA concatamer-based signal amplification, *Biosens. Bioelectron.* 56 (2014) 12–18.
